# Supplementary material for: Solution Structure of the Circular γ-Domain Analog from the Wheat Metallothionein Ec-1
Source: Molecules. 2013 Nov 21;18(11):14414–29. doi: 10.3390/molecules181114414 (PMC6269658; doi:10.3390/molecules181114414)
Supplement: Supplementary file 1 [file molecules-18-14414-s001.pdf]

## Supplementary Materials

**Figure S1.** SEC elution profile of cyc-Zn<sub>2</sub>γ-E<sub>c</sub>-1. The single symmetric peak with an elution volume of 12.1 mL corresponds to monomeric cyc-Zn<sub>2</sub>γ-E<sub>c</sub>-1. Peaks with elution volumes larger than 17 mL originate from buffer components. Experimental details: Superdex Peptide HR 10/30 column (GE Healthcare), flow rate 0.4 mL min<sup>-1</sup>, 10 mM Tris-HCl pH 7.4, 10 mM NaCl.

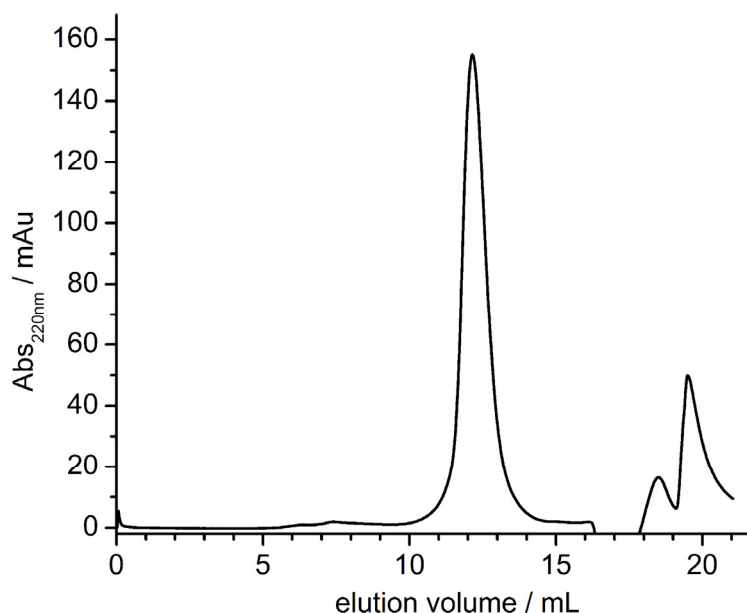

**Figure S2.** Chemical shift differences from [<sup>1</sup>H,<sup>1</sup>H]-TOCSY spectra for the backbone amide H<sup>N</sup> (gray bars) and H<sup>α</sup> (black bars) protons of residues 2-25 from cyc- and linear Cd<sub>2</sub>γ-E<sub>c</sub>-1.

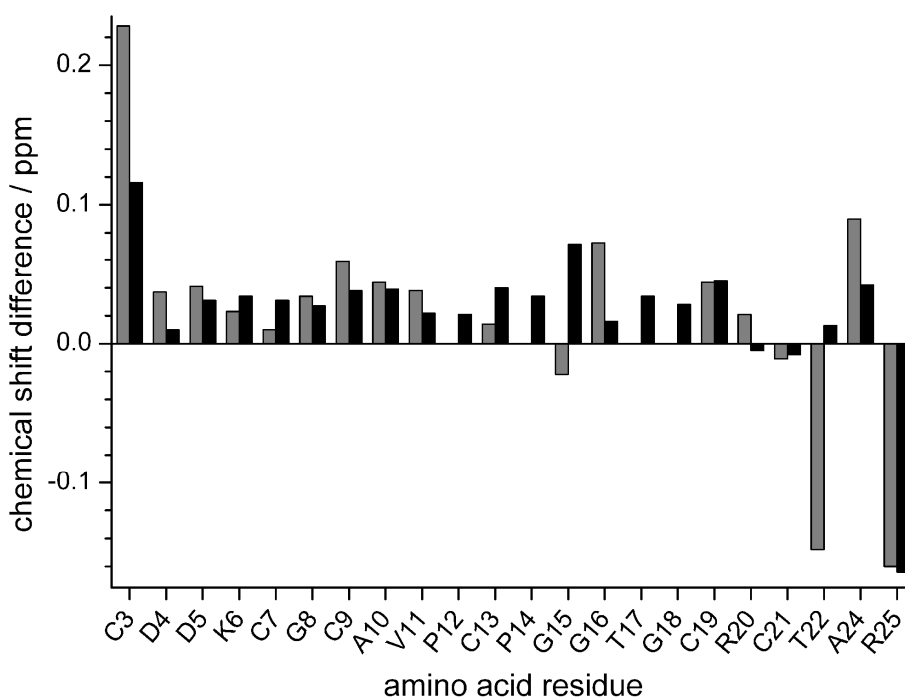

**Table S1.** Statistic of the 20 lowest energy structures for the two cysteine cluster arrangements (C3/C9, C21/C9), structure calculated without any cluster restraints (No MR) and Cys3/Cys9 structure calculated in assumption of both Pro residues being in trans conformation (C3/C9\_T12T14).

| Parameter                             | C3/C9        | C21/C9         | No MR        | C3/C9_T12T14 |
|---------------------------------------|--------------|----------------|--------------|--------------|
| XPLOR total energy                    | 46.64 ± 0.69 | 171.48 ± 63.15 | 25.58 ± 0.29 | 62.91 ± 1.14 |
| Quality of peak assignment (CYANA)    | 0.989 (1)    | 0.982 (10)     | 0.979 (11)   | 0.980 (10)   |
| <b>Procheck-NMR (residues 2-23)</b>   |              |                |              |              |
| In most favored regions (%)           | 58.3         | 55             | 59.3         | 59.3         |
| In additional allowed (%)             | 41.7         | 45             | 40           | 40.7         |
| In generously allowed (%)             | 0            | 0              | 0.7          | 0            |
| In disallowed regions (%)             | 0            | 0              | 0            | 0            |
| <b>Verify 3D [30] (residues 2-23)</b> |              |                |              |              |
| Raw score                             | 0.43         | 0.41           | 0.38         | 0.42         |
| Z-score                               | −0.48        | −0.80          | −1.28        | −0.64        |

\* Numbers in brackets correspond to the quantity of non-used NOE restraints by CYANA.

**Table S2.** NOE statistic for circular and linear Cd<sub>2</sub>γ-E<sub>c</sub>-1 structures calculated with CYANA.

| Parameter              | cyc-Cd <sub>2</sub> γ-E <sub>c</sub> -1 | lin-Cd <sub>2</sub> γ-E <sub>c</sub> -1 |
|------------------------|-----------------------------------------|-----------------------------------------|
| NOE restraints: Total  | 201                                     | 157                                     |
| Sequential ( i-j  < 1) | 142                                     | 103                                     |
| Medium (1 <  i-j  < 5) | 38                                      | 44                                      |
| Long range ( i-j  < 5) | 21                                      | 10                                      |
